# Supplementary material for: Differential substituent effects of β-halogens in water-soluble porphyrinsElectronic supplementary information (ESI) available: electrochemical procedures, procedure for pKa determinations, Beer’s law deviations, calculations, Table S1 and Figs. S1 to S9. See http://www.rsc.org/suppdata/ob/b2/b209345f/
Source: Royal Society of Chemistry journal article supplement (doi:10.1039/b209345f), 2003-01-24
Supplement: b209345f.doc [file b209345f.doc]

Supplementary data

Differential Substituent Effects of β-Halogens in Water-Soluble Porphyrins

Justin C. Biffinger, Haoran Sun, Andrew P. Nelson, and Stephen G. DiMagno*

Electrochemical Procedures: Cyclic voltammograms (CV), square wave voltammograms (SWV) and differential pulse volatammograms (DPV) were obtained with a computer controlled (M270 software) EG&G PARC M273A potentiostat/galvanostat. A three-electrode system (glassy carbon working electrode (Cypress), Pt wire counter electrode, and a homemade Ag/AgCl (sat’d KCl) reference electrode) was used for the electrochemical experiments. All reported potentials are referenced to Ag/AgCl. The working electrode was polished using EG&G polishing kits and cleaned ultrasonically in water (Fluka, inorganic trace analysis grade). All solutions were degassed and all electrochemical experiments were conducted under N2.

Procedure for pKa determinations. Absorption spectra of the free base porphyrins in aqueous solution (< 10-6 M) were obtained as a function of pH at constant ionic strength (generally 0.1 M, with NaNO3 making up the electrolyte balance). The pKa values were determined by spectrophotometric titrations at 23 ºC; the pH was adjusted with NaOH or HNO3. In all cases the Soret bands were monitored. Clean isosbestic behavior was observed for 1 for all measurable pKas; for 2 more than two species were observed in the 0 > pH > -1 range. Representative traces are shown in Figures S1-S5. The pKa values reported are accurate to ±0.1. Low pH solutions (pH < 0) were obtained by adding measured quantities of conc. HNO3 (15.9 M) to dilute porphyrin solutions. (At extremely low pH, constant ionic strength was not maintained.)


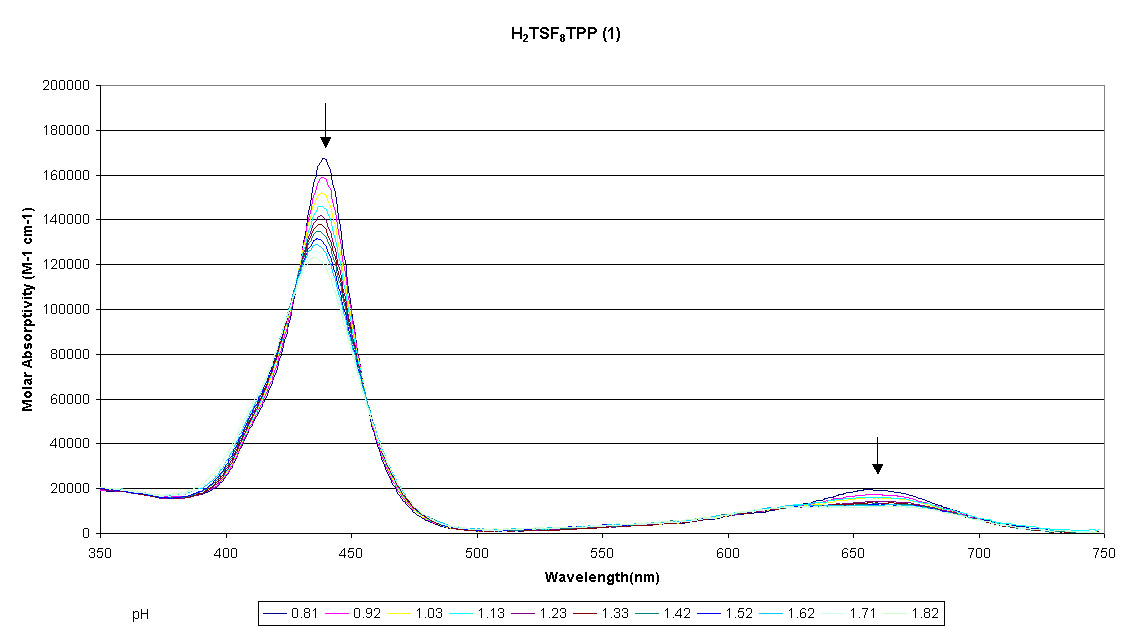


Figure S1. Change in absorption spectrum of 1 over the pH range 0.81-1.82.


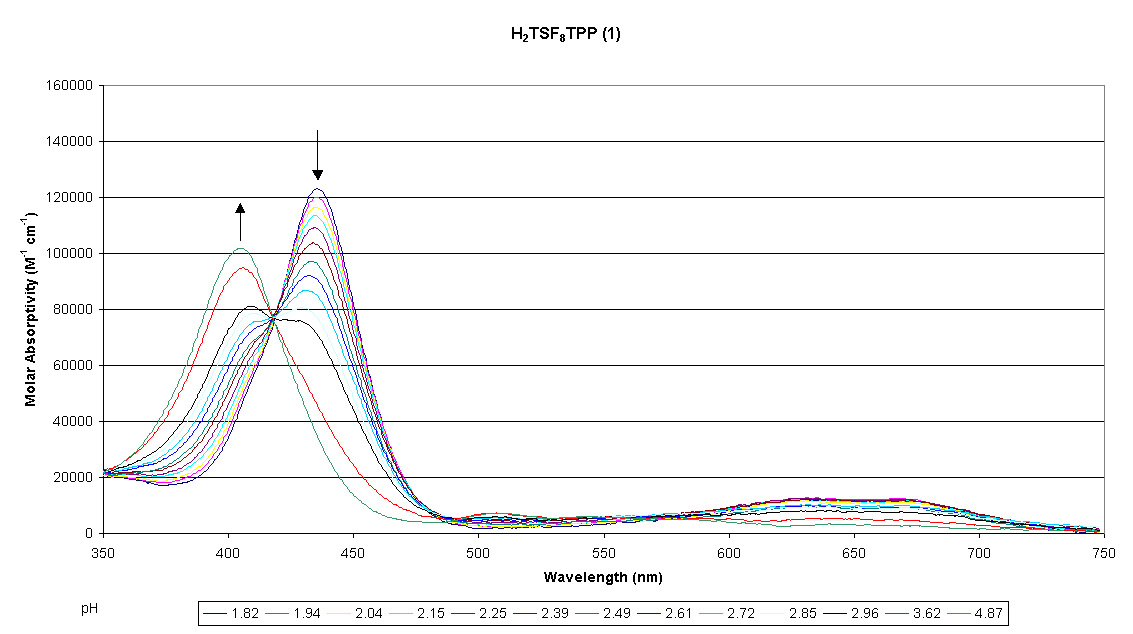


Figure S2. Change in absorption spectrum of 1 over the pH range1.82 - 4.87.


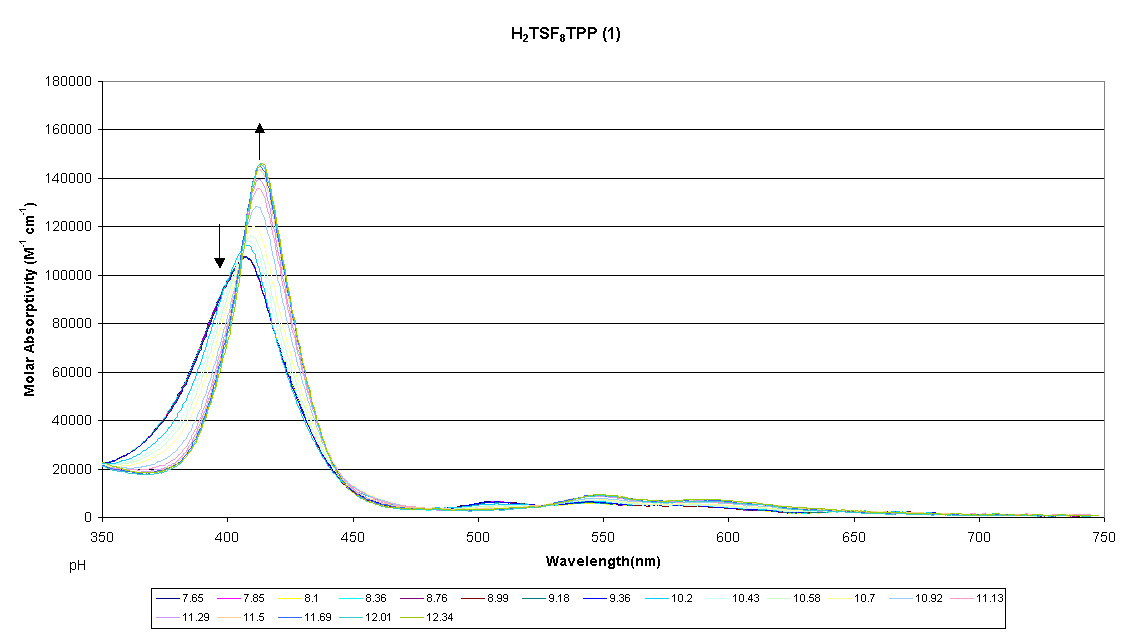


Figure S3. Change in absorption spectrum of 1 over the pH range 7.67 -12.34.


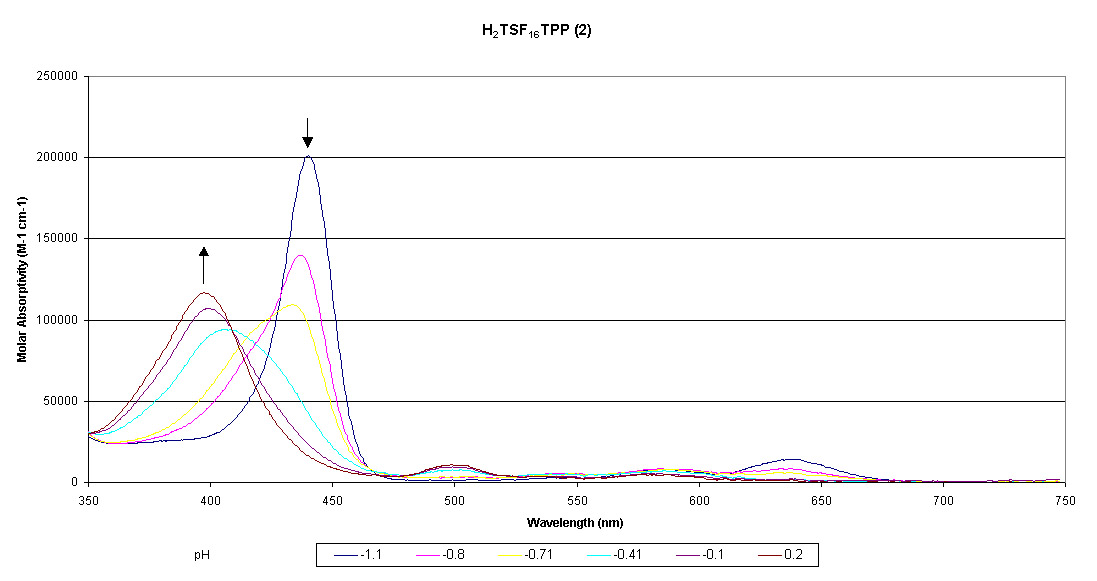


Figure S4. Change in absorption spectrum of 2 over the pH range –1.1 - 0.2.


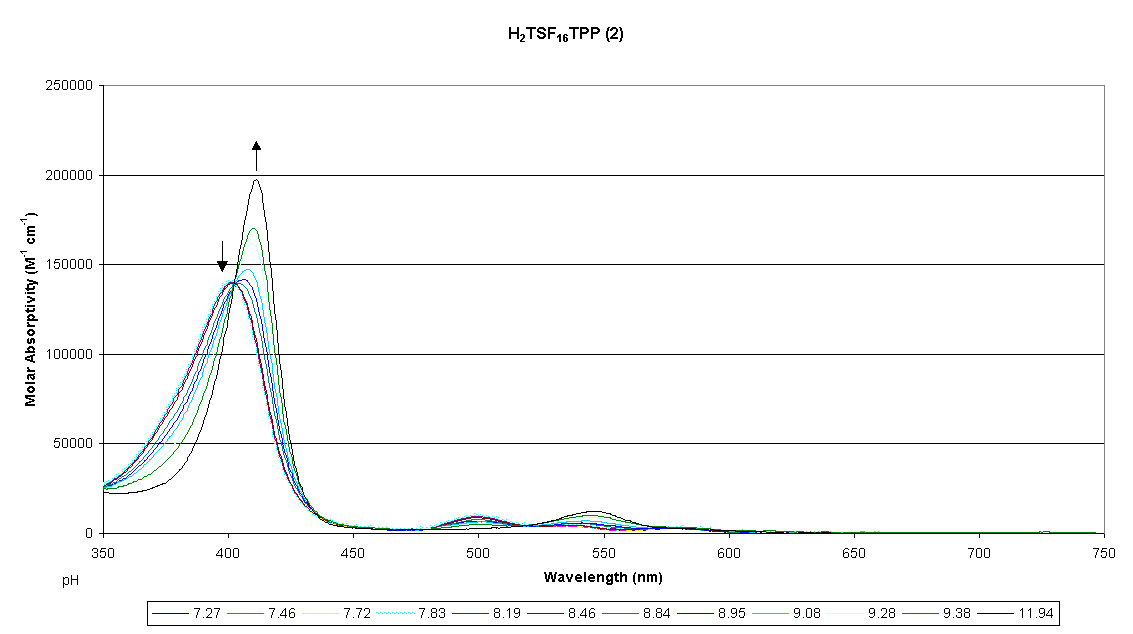


Figure S5. Change in absorption spectrum of 2 over the pH range 11.94 – 7.27.

Beer’s Law Deviations. Aggregation of fluorinated anionic porphyrins was studied in aqueous solution (I = 0.1 NaNO3) at neutral pH. Aggregation was detected by deviation from Beer’s law in the porphyrin concentration range of 10-5 – 10-7 M.1,2 Representative plots are shown in Figures S6-S9.


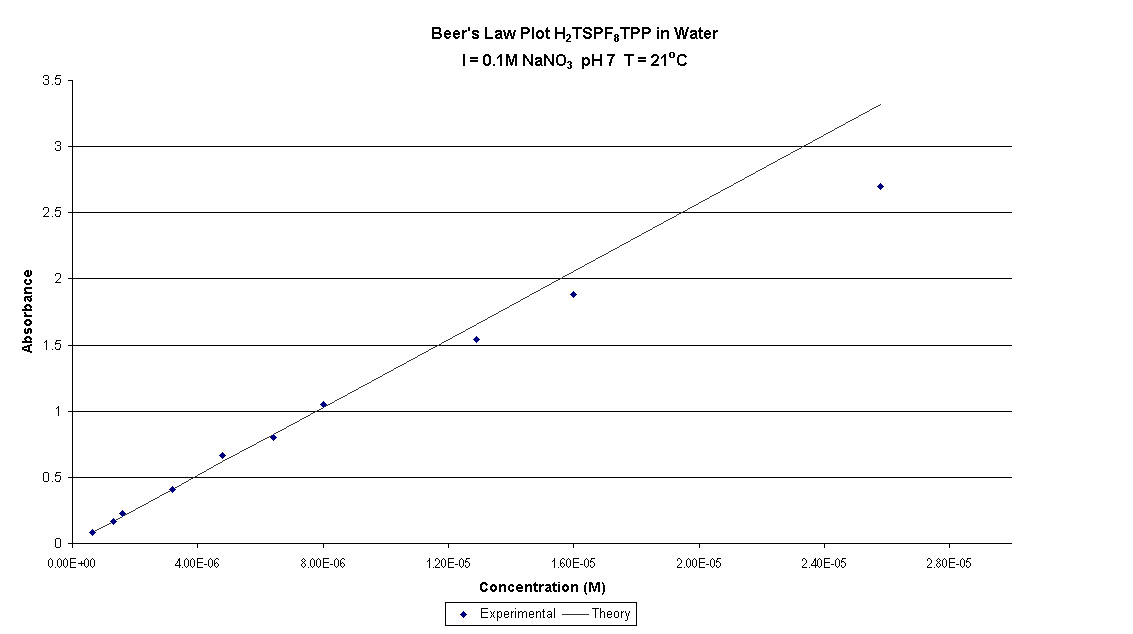


Figure S6. Concentration dependent absorption of 1 at  = 406 nm. There is evidence for aggregation (deviation from Beer’s Law behavior) at [1] > 8x10-6 M.


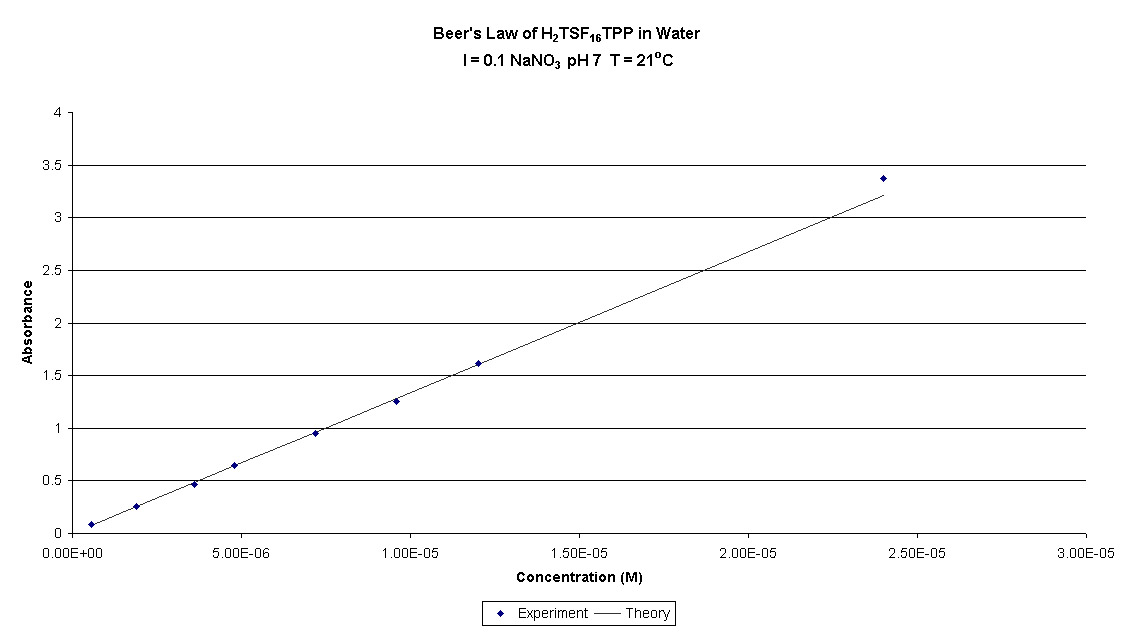


Figure S7. Concentration dependent absorption of 2 at  = 399 nm. There is no evidence for aggregation at [2] < 2.5x10-5 M.

#
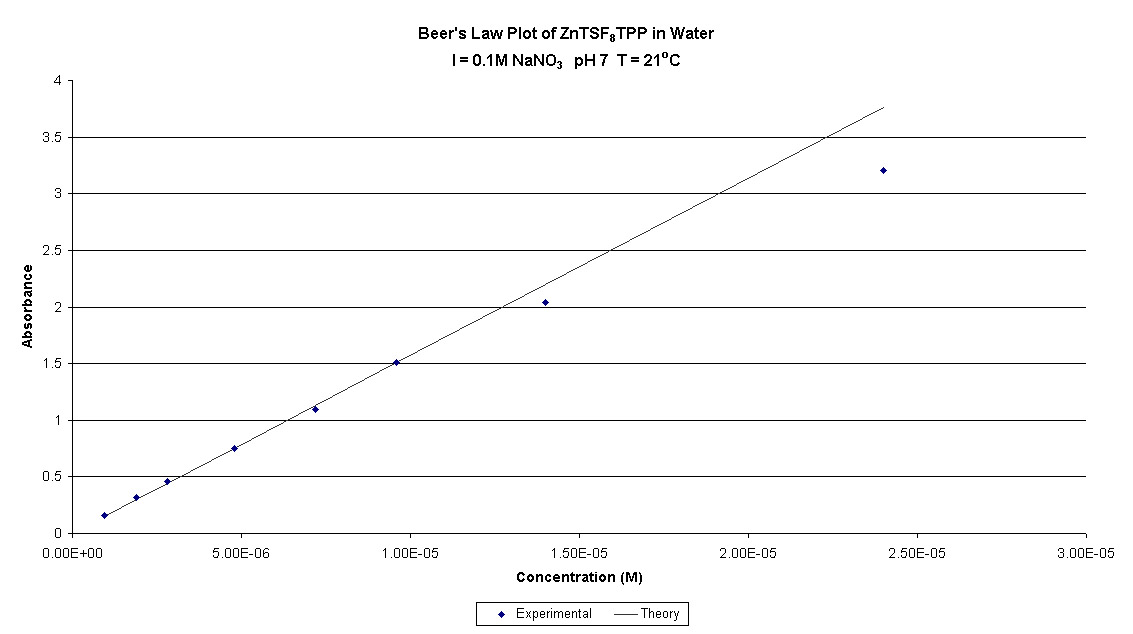


Figure S8. Concentration dependent absorption of 3 at  = 410 nm. There is evidence for aggregation (deviation from Beer’s Law behavior) at [3] > 10-5 M.


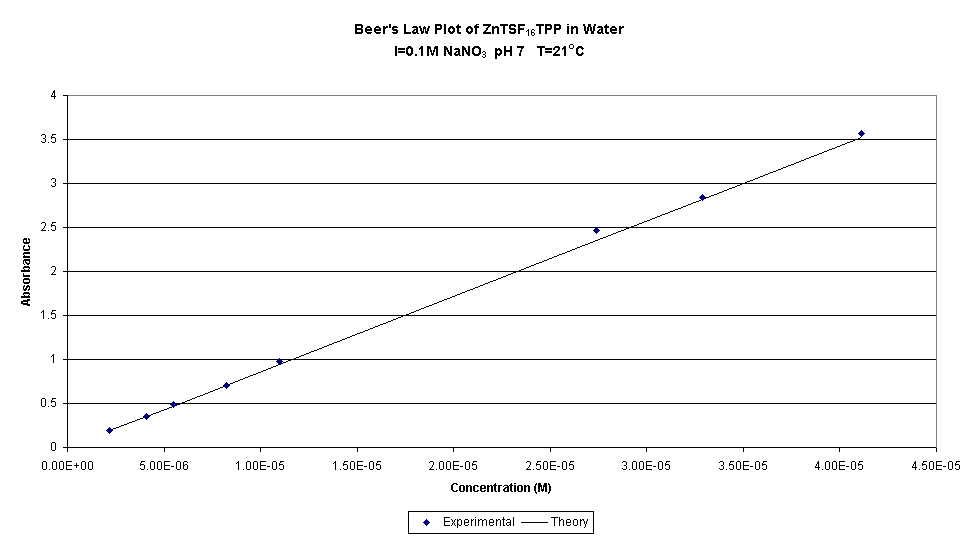


Figure S9. Concentration dependent absorption of 4 at  = 410 nm. There is no evidence for aggregation at [4] < 4x10-5 M.

# Calculations: All calculations were performed using the PC Spartan Pro program.3 For the constrained [*Con*] porphyrins a total of 8 dihedral constraints (N-Ca-C*meso*-Ca’ = ±20º) were imposed to induce saddling. The calculated (AM1) heats of formation are summarized in Table S1. All energies are in kcal/mol. Gas phase acidities were calculated using the AM1-derived ΔHf (proton) = 365.6 kcal/mol.

**Table S1**. Results of Semiempirical (AM1) Calculations.

| aCompd | b-H8 | Acidity | b-F8 | Acidity | b-Br8 | Acidity |
| --- | --- | --- | --- | --- | --- | --- |
|  | Hf |  | Hf |  | Hf |  |
| PH2+ | 580.889 | 158.115 | 271.164 | 139.394 | 639.944 | 149.684 |
| PH+ | 373.404 | 234.831 | 44.958 | 212.436 | 424.028 | 220.134 |
| P | 242.635 | 338.822 | -108.206 | 311.63 | 278.562 | 314.938 |
| P- | 215.857 | 433.227 | -162.176 | 406.16 | 227.9 | 405.676 |
| P2- | 283.484 |  | -121.616 |  | 267.976 |  |
| conPH2+ | 585.923 | 160.117 | 276.643 | 141.437 | 644.111 | 151.552 |
| conPH+ | 380.44 | 237.677 | 52.48 | 214.981 | 430.063 | 222.944 |
| conP | 252.517 | 337.201 | -98.139 | 310.231 | 287.407 | 313.586 |
| conP- | 224.118 | 431.417 | -153.508 | 405.034 | 235.393 | 404.596 |
| conP2- | 289.935 |  | -114.074 |  | 274.389 |  |
|  |  |  |  |  |  |  |
| tetraphenyl analogues |  |  |  |  |  |  |
| PH2+ | 675.143 | 176.455 | 375.097 | 164.534 | 750.232 | 171.009 |
| PH+ | 485.998 | 240.865 | 174.031 | 219.285 | 555.641 | 226.218 |
| P | 361.263 | 335.736 | 27.716 | 321.12 | 416.259 | 322.773 |
| P- | 331.399 | 414.527 | -16.764 | 393.986 | 373.432 | 394.428 |
| P2- | 380.326 |  | 11.622 |  | 402.26 |  |
|  |  |  |  |  |  |  |
| tetrakis(2,6-difluorophenyl) analogues |  |  |  |  |  |  |
| PH2+ | 341.053 | 173.262 | 38.49 | 161.556 | 414.301 | 169.31 |
| PH+ | 148.715 | 231.895 | -165.554 | 217.403 | 218.011 | 225.656 |
| P | 15.01 | 343.914 | -313.751 | 321.822 | 78.067 | 324.234 |
| P- | -6.676 | 415.06 | -357.529 | 393.46 | 36.701 | 392.571 |
| P2- | 42.784 |  | -329.669 |  | 63.672 |  |

aPH2 = free base, PH+ = monoprotonated cation , PH2+ = diprotonated dication, PH-=monodeprotonated anion, P2- = fully deprotonated dianion, con indicates a constrained, saddled structure. b Indicates the 8 substituents at the 2,3,7,8,12,13,17,18 positions. cCalculated heat of formation in kcal/mol. dCalculated gas phase acidity in kcal/mol. Acidity = Hf (base) + Hf (proton) - Hf (acid).

**References for Supplementary data:**

(1) Pasternack, R. F.; Francesconi, L.; Raff, D.; Spiro, E. *Inorg. Chem.* **1973**, *12*, 2606-11.

(2) D'Souza, F.; Deviprasad, G. R.; Zandler, M. E. *J. Chem. Soc., Dalton Trans.* **1997**, 3699-3703.

(3) Deppmeier, B. J.; Wavefunction Inc: Irvine CA, 1996-2000.
